# Supplementary material
Source: publisher figshare collection journal article supplement (https://karger.figshare.com/ndownloader/files/25194860)
Supplement: Supplementary file 1 [file 25194860]

Supplementary Table 1. Baseline characteristics of the groups divided according to the median of handgrip strength

| **Variables** | **handgrip strength**  **≥ 28.5 kg**  **(n = 26)** | **handgrip strength**  **< 28.5 kg**  **(n = 24)** | ***P*-value** |
| --- | --- | --- | --- |
| Age (year) | 61.4 ± 9.3 | 66.3 ± 9.5 | 0.07 |
| Sex (% male) | 24 (92%) | 13 (54%) | 0.002 |
| Diabetes mellitus | 5 (19%) | 10 (42%) | 0.08 |
| APD/CAPD | 7/19 (27/73%) | 6/18 (25/75%) | 0.88 |
| Cardiovascular disease | 9 (35%) | 7 (29%) | 0.68 |
| Smoking history | 17 (65%) | 11 (46%) | 0.16 |
| Assisted PD | 3 (12%) | 8 (33%) | 0.09 |
| Frailty | 1 (4%) | 4 (17%) | 0.18 |
| Charlson comorbidity index | 3.0 (2.0–3.8) | 3.0 (2.0–4.0) | 0.40 |
| PD vintage (year) | 2.4 (0.8-5.5) | 4.2 (2.3-6.9) | 0.06 |
| BMI (kg/m2) | 24.5 ± 3.7 | 23.1 ± 4.3 | 0.25 |
| SMI (kg/m2) | 7.7 ± 1.2 | 6.8 ± 1.1 | 0.008 |
| Systolic BP (mmHg) | 140.2 ± 22.4 | 136.3 ± 19.4 | 0.52 |
| Diastolic BP (mmHg) | 78.8 ± 12.9 | 73.5 ± 12.3 | 0.15 |
| Urine output (mL/day) | 705 (13-1137) | 190 (0-925) | 0.17 |
| Renal Kt/V | 0.33 (0.02-0.94) | 0.10 (0.00-0.48) | 0.11 |
| PD Kt/V | 1.20 (0.99-1.55) | 1.37 (1.21-1.61) | 0.22 |
| Total Kt/V | 1.74 (1.55-1.93) | 1.64 (1.40-1.82) | 0.42 |
| Albumin (g/dL) | 3.5 ± 0.5 | 3.4 ± 0.5 | 0.81 |
| Hemoglobin (g/dL) | 10.6 ± 1.1 | 10.6 ± 1.4 | 0.79 |
| GNRI | 98.7 ± 10.2 | 94.9 ± 10.1 | 0.19 |
| Calcium (mg/dL) | 9.2 (8.8-9.8) | 9.6 (9.1-9.9) | 0.24 |
| Phosphorus (mg/dL) | 5.5 (4.8–5.8) | 5. 3 (4.4–6.0) | 0.21 |
| PTH (pg/mL) | 205.5 (94.3–298.0) | 176.0 (140.3–240.0) | 0.59 |
| CRP (mg/dL) | 0.14 (0.03-0.23) | 0.06 (0.03-0.26) | 0.66 |
| hANP (pg/mL) | 61.4 (47.5-151.5) | 72.9 (55.9-114.2) | 0.63 |
| ISWT (m) | 360 (280-488) | 250 (173-317) | <0.001 |
| Handgrip strength (kg) | 31.0 (29.2-35.0) | 23.0 (20.0-26.0) | <0.001 |
| Quadriceps strength (kg) | 29.4 (21.8-36.2) | 14.6 (11.6-23.7) | <0.001 |

Continuous variables are expressed as means ± standard deviation or median (25th–75th percentile) and binary variables as number (percentage). Abbreviations: ISWT, incremental shuttle walking test; HD, hemodialysis; APD, automated peritoneal dialysis; CAPD, continuous ambulatory peritoneal dialysis; BMI, body mass index; SMI, skeletal mass index; BP, blood pressure; GNRI, geriatric nutritional risk index; PTH, parathyroid hormone; CRP, C-reactive protein; hANP, human atrial natriuretic peptide; ISWT, incremental shuttle walking test.

Supplementary Table 2. Baseline characteristics of the groups divided according to the median of quadriceps strength

| **Variables** | **Quadriceps strength ≥ 22.3 kg**  **(n = 25)** | **Quadriceps strength < 22.3 kg**  **(n = 25)** | ***P*-value** |
| --- | --- | --- | --- |
| Age (year) | 60.9 ± 8.0 | 66.7 ± 10.4 | 0.03 |
| Sex (% male) | 22 (88%) | 15 (60%) | 0.02 |
| Diabetes mellitus | 8 (32%) | 7 (28%) | 0.76 |
| APD/CAPD | 7/18 (28/72%) | 6/19 (24/76%) | 0.75 |
| Cardiovascular disease | 8 (32%) | 8 (32%) | 1.00 |
| Smoking history | 14 (56%) | 14 (56%) | 1.00 |
| Assisted PD | 5 (20%) | 6 (24%) | 1.00 |
| Frailty | 1 (4%) | 4 (16%) | 0.35 |
| Charlson comorbidity index | 3.0 (2.0–4.0) | 3.0 (2.0–4.0) | 0.58 |
| PD vintage (year) | 2.6 (0.5-5.4) | 4.1 (2.0-6.6) | 0.12 |
| BMI (kg/m2) | 25.0 ± 3.6 | 22.6 ± 4.1 | 0.03 |
| SMI (kg/m2) | 7.9 ± 1.1 | 6.8 ± 1.1 | <0.001 |
| Systolic BP (mmHg) | 135.6 ± 21.7 | 141.1 ± 20.1 | 0.36 |
| Diastolic BP (mmHg) | 77.6 ± 12.8 | 74.9 ± 12.8 | 0.47 |
| Urine output (mL/day) | 650 (0-1150) | 80 (0-900) | 0.24 |
| Renal Kt/V | 0.33 (0.00-0.94) | 0.13 (0.00-0.48) | 0.21 |
| PD Kt/V | 1.21 (1.00-1.55) | 1.37 (1.03-1.58) | 0.34 |
| Total Kt/V | 1.73 (1.55-1.94) | 1.69(1.37-1.81) | 0.31 |
| Albumin (mg/dL) | 3.4 ± 0.5 | 3.5 ± 0.5 | 0.58 |
| Hemoglobin (g/dL) | 10.5 ± 1.1 | 10.7 ± 1.4 | 0.55 |
| GNRI | 98.9 ± 9.6 | 94.9 ± 10.6 | 0.18 |
| Calcium (mg/dL) | 9.2 (8.8-9.8) | 9.6 (9.2-9.8) | 0.07 |
| Phosphorus (mg/dL) | 5.2 (4.7–5.8) | 5. 4 (4.4–6.0) | 0.83 |
| PTH (pmol/L) | 171.0 (72.0-231.0) | 193.0 (168.0-296.0) | 0.26 |
| CRP (mg/dL) | 0.15 (0.03-0.24) | 0.06 (0.03-0.20) | 0.25 |
| hANP (pg/mL) | 72.7 (50.3-120.0) | 68.4 (48.1-114.0) | 0.67 |
| ISWT (m) | 350 (280-430) | 270 (190-340) | 0.02 |
| Handgrip strength (kg) | 30.0 (28.0-33.9) | 24.9 (20.1-28.5) | <0.001 |
| Quadriceps strength (kg) | 31.2 (27.5-36.3) | 14.5 (11.6-19.3) | <0.001 |

Continuous variables are expressed as means ± standard deviation or median (25th–75th percentile) and binary variables as number (percentage). Abbreviations: ISWT, incremental shuttle walking test; HD, hemodialysis; APD, automated peritoneal dialysis; CAPD, continuous ambulatory peritoneal dialysis; BMI, body mass index; SMI, skeletal mass index; BP, blood pressure; GNRI, geriatric nutritional risk index; PTH, parathyroid hormone; CRP, C-reactive protein; hANP, human atrial natriuretic peptide; ISWT, incremental shuttle walking test.
